# Supplementary material for: Docosahexaenoic acid-acylated astaxanthin ester exhibits superior performance over non-esterified astaxanthin in preventing behavioral deficits coupled with apoptosis in MPTP-induced mice with Parkinson's disease
Source: Royal Society of Chemistry journal article supplement (doi:10.1039/d0fo01176b), 2020-01-01
Supplement: d0fo01176b1.pdf [file d0fo01176b1.pdf]

1 Supplemental information

2 **Table S1 Ingredient of experimental diet**

| Ingredients              | Weight (g/kg) |
|--------------------------|---------------|
| Casein                   | 200           |
| Cornstarch               | 399.5         |
| Sucrose                  | 100           |
| Corn oil                 | 50            |
| Lard                     | 150           |
| Mineral mix <sup>a</sup> | 35            |
| Vitamin mix <sup>a</sup> | 10            |
| Cellulose                | 50            |
| Choline bitartrate       | 3             |
| DL-methionine            | 2.5           |

3 <sup>a</sup>Modified AIN-93G

**Table S2 Sequences of the primers used in quantitative real-time PCR**

| Gene           | Forward primer         | Reverse primer            |
|----------------|------------------------|---------------------------|
| TH             | ATCCAGCGCTCCTTGG       | AGATTCTTTCCTTCCTTTATTGAGA |
| Bax            | GCTGATGGCAACTTCAACTG   | ACTCCAGCCACAAAGATGGT      |
| Bcl-2          | CGGGAGAACAGGGTATGATA   | CCACCGAACTCAAAGAAGG       |
| Bcl-xl         | TTCGGGATGGAGTAAACTGG   | GGATCCAAGGCTCTAGGTG       |
| Caspase 9      | ACAATAAATCTTCGGCAATA   | TGGGGACCAGGCTCACTT        |
| Caspase 3      | TGACTGGAAAGCCGAACT     | CTGGATGAACCACGACC C       |
| Caspase 8      | ACAATGCCAGATTTCTCCCTAC | CAGACAGTATCCCCGAGGTTTG    |
| PARP           | AGGCCCTCAAGGCTCAGAAT   | CATGGATTCTGTGTCTTG AC     |
| $\beta$ -actin | AGGCCCTCAAGGCTCAGAAT   | CATGGATTCTGTGTCTT GAC     |
